# Supplementary material
Source: PubMed Central journal article supplement (PMC3308785)
Supplement: supp_M111.336222_jbc.M111.336222-1.pdf [file supp_M111.336222_jbc.M111.336222-1.pdf]

## SUPPLEMENTAL MATERIAL

### INSIGHTS INTO THE STRUCTURAL NETWORK RESPONSIBLE FOR OLIGOMERIZATION AND ACTIVITY OF THE BACTERIAL VIRULENCE REGULATOR CLPP\*

Malte Gersch<sup>1,2,#,‡</sup>, Anja List<sup>1,2,‡</sup>, Michael Groll<sup>1</sup> and Stephan A. Sieber<sup>1</sup>

<sup>1</sup> Center for Integrated Protein Science Munich (CIPS<sup>M</sup>), Technische Universität München, Department of Chemistry, Lichtenbergstr. 4, 85747 Garching, Germany.

<sup>2</sup> These authors contributed equally to this work.

#### Supplementary Figures

#### Supplementary Figure 1: pH-profile of ClpP peptidase activity determined by the fluorescent substrate assay.

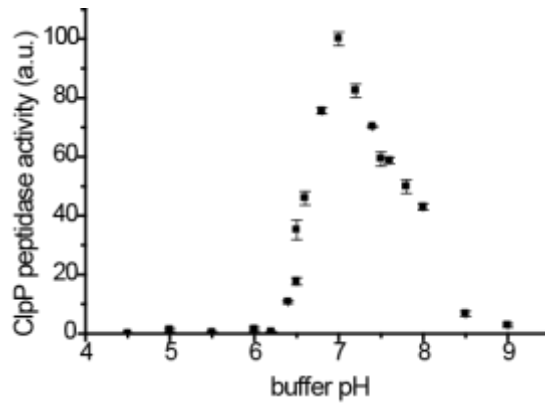

Supplementary Tables

Supplementary Table 1: Primers used in this study

| #  | Name                | Sequence <sup>a</sup>                                                              |
|----|---------------------|------------------------------------------------------------------------------------|
| 1  | SaClpP-for-rbs      | GGGGACAAGTTTGTACAAAAAGCAGGCTTTGAAGGAGATAGAACCATGAATTTAATTCCTACAGTTATTGAAAC         |
| 2  | SaClpP-rev-Strep    | GGGGACCACITTTGTACAAGAAAAGCTGGGTGTTATTTTTCGAACTGCGGGTGGCTCCATTTTGTTCAGGTACCATCACTTC |
| 3  | Q35A-for            | AGACCGTATTATTATGTTAGGTTCA <b>GC</b> AATTGATGACAACGTAGCAAATTCA                      |
| 4  | Q35A-rev            | TGAATTTGCTACGTTGTCATCAATT <b>GCT</b> GAACTAACATAATAATACGGTCT                       |
| 5  | S98A-for            | ATTTGTATCGGTATGGCTGCA <b>GC</b> AATGGGATCATTCTTATTAG                               |
| 6  | S98A-rev            | CTAATAAGAATGATCCCATTG <b>CT</b> GTCAGCCATACCGATACAAAT                              |
| 7  | S98C-for            | ACAATTTGTATCGGTATGGCTGCAT <b>GC</b> ATGGGATCATTCTTATTAGC                           |
| 8  | S98C-rev            | GCTAATAAGAATGATCCCATGCAT <b>GC</b> AGCCATACCGATACAAATTGT                           |
| 9  | S98T-for            | AATTTGTATCGGTATGGCTGCA <b>ACG</b> ATGGGATCATTCTTATTAGCAG                           |
| 10 | S98T-rev            | CTGCTAATAAGAATGATCCCAT <b>CGT</b> TGCAGCCATACCGATACAAATT                           |
| 11 | G127AG128AG131A-for | GTAATGATTCACCAACCATTAG <b>CTGCT</b> GTCTCAAG <b>CA</b> ACAAGCAACTGAAATCGAAATTGCT   |
| 12 | G127AG128AG131A-rev | AGCAATTTTCGATTTTCAGTTGCTT <b>GTGCT</b> TGAGCA <b>GCAG</b> CTAATGGTTGGTGAATCATTAC   |
| 13 | Q130A-for           | CACCAACCATTAGGTGGTGCT <b>GC</b> AGGACAAGCAACTG                                     |
| 14 | Q130A-rev           | CAGTTGCTTGTCT <b>GC</b> AGCACCACCTAATGGTTGGTG                                      |
| 15 | Q132A-for           | CCAACCATTAGGTGGTGCTCAAGG <b>AGC</b> AGCAACTGAAATCG                                 |
| 16 | Q132A-rev           | CGATTTTCAGTTGCT <b>GC</b> TCCTTGAGCACCACCTAATGGTTGG                                |
| 17 | E135A-for           | GCTCAAGGACAAGCAACT <b>GC</b> AATCGAAATTGCTGCAAAAT                                  |
| 18 | E135A-rev           | ATTTGCAGCAATTTTCGATT <b>GC</b> AGTTGCTTGTCTTGGAGC                                  |
| 19 | E135R-for           | GGTGCTCAAGGACAAGCAACT <b>AG</b> AATCGAAATTGCTGCAAATCA                              |
| 20 | E135R-rev           | TGATTTGCAGCAATTTTCGATT <b>CT</b> AGTTGCTTGTCTTGGAGCACC                             |
| 21 | E137A-for           | CAAGGACAAGCAACTGAAATCG <b>CA</b> AATTGCTGCAAATCACATTTTA                            |
| 22 | E137A-rev           | TAAAATGTGATTTGCAGCAATT <b>GCG</b> ATTTTCAGTTGCTTGTCTTGG                            |
| 23 | L144E-for           | CAACTGAAATCGAAATTGCTGCAAATCACATT <b>GAG</b> AAAAACACGTGAAAAATTAACCCGCATTTTATC      |
| 24 | L144E-rev           | GATAAAATGCGGTTAATTTTTACGTGTTTT <b>CTC</b> AATGTGATTTGCAGCAATTTTCGATTTTCAGTTG       |
| 25 | L144G-for           | GAAATCGAAATTGCTGCAAATCACATT <b>GG</b> AAAAACACGTGAAAAATTAACCCGCAT                  |
| 26 | L144G-rev           | ATGCGGTTAATTTTTACGTGTTTT <b>CCA</b> ATGTGATTTGCAGCAATTTTCGATTTTC                   |
| 27 | L144M-for           | GAAATCGAAATTGCTGCAAATCACATT <b>ATG</b> AAAAACACGTGAAAAATTAACCCGCATT                |
| 28 | L144M-rev           | AATGCGGTTAATTTTTACGTGTTTT <b>CAT</b> AATGTGATTTGCAGCAATTTTCGATTTTC                 |
| 29 | L144R-for           | GAAATCGAAATTGCTGCAAATCACATT <b>AG</b> AAAAACACGTGAAAAATTAACCCGCAT                  |
| 30 | L144R-rev           | ATGCGGTTAATTTTTACGTGTTTT <b>CT</b> AATGTGATTTGCAGCAATTTTCGATTTTC                   |
| 31 | D170A-for           | TGAAAAAATACAAAAAGACACAG <b>CT</b> CGTGATAACTTCTTAACCTGCAG                          |
| 32 | D170A-rev           | CTGCAGTTAAGAAGTTATCACG <b>AGCT</b> GTGTCTTTTTGTATTTTTTCA                           |
| 33 | R171A-for           | GTATTGAAAAAATACAAAAAGACACAGAT <b>GC</b> TGATAACTTCTTAACCTGCAGAAGA                  |
| 34 | R171A-rev           | TCTTCTGCAGTTAAGAAGTTATCA <b>GC</b> ATCTGTGTCTTTTTGTATTTTTTCAATAC                   |
| 35 | R171K-for           | CAAAGTATTGAAAAAATACAAAAAGACACAGAT <b>AGG</b> CAACTTCTTAACCTGCAGAAGAAGCTAAAGAA      |
| 36 | R171K-rev           | TTCTTTAGCTTCTCTGCAGTTAAGAAGTTATC <b>CTT</b> ATCTGTGTCTTTTTGTATTTTTTCAATACTTTG      |

<sup>a</sup> attB1/attB2 sequences, Shine-Dalgarno and Kozack sequences, STREP II-tag sequence, **changed nucleotides for point mutations.**

Supplementary Table 2: Comparison of ClpP-Structure entries of the PDB

| <b>Code</b> | <b>Resolution</b> | <b>Organism</b>                        | <b>E-Helix</b>           | <b>Barrel height</b> | <b>Active site</b> | <b>Reference</b> |
|-------------|-------------------|----------------------------------------|--------------------------|----------------------|--------------------|------------------|
| <b>3KTG</b> | 2.4 Å             | <i>Bacillus subtilis</i>               | straight                 | 9 nm                 | aligned            | (1)              |
| <b>3Q7H</b> | 2.5 Å             | <i>Coxiella burnetii</i>               | straight                 | 9 nm                 | not aligned        | -                |
| <b>1YG6</b> | 1.9 Å             | <i>Escherichia coli</i>                | straight                 | 9 nm                 | aligned            | (2)              |
| <b>3P2L</b> | 2.3 Å             | <i>Francisella tularensis</i>          | straight                 | 9 nm                 | aligned            | -                |
| <b>2ZL0</b> | 2.6 Å             | <i>Helicobacter pylori</i>             | straight                 | 9 nm                 | aligned            | (3)              |
| <b>1TG6</b> | 2.1 Å             | <i>Homo sapiens</i>                    | straight                 | 9 nm                 | aligned            | (4)              |
| <b>3STA</b> | 2.3 Å             | <i>Staphylococcus aureus</i>           | straight                 | 9 nm                 | not aligned        | (5)              |
| <b>3V5E</b> | 2.3 Å             | <i>Staphylococcus aureus</i>           | straight                 | 9 nm                 | aligned            | This study       |
| <b>3QWD</b> | 2.1 Å             | <i>Staphylococcus aureus</i>           | kinked (H123-K145)       | 8 nm                 | not aligned        | (6)              |
| <b>2CBY</b> | 2.6 Å             | <i>Mycobacterium tuberculosis</i>      | not resolved (P125–I136) | 8 nm                 | not aligned        | (7)              |
| <b>2F6I</b> | 2.5 Å             | <i>Plasmodium falciparum</i>           | not resolved (P291–I304) | 8 nm                 | not aligned        | (8)              |
| <b>1Y7O</b> | 2.5 Å             | <i>Streptococcus pneumonia</i> (A153P) | not resolved (P123–A139) | 8 nm                 | not aligned        | (9)              |
| <b>3TT6</b> | 2.6 Å             | <i>Bacillus subtilis</i>               | not resolved (P124–E136) | 8 nm                 | not aligned        | (10)             |

Supplementary Table 3: Melting Temperatures as determined by thermal shift assays

| <b>SaClpP protein</b> | <b>Melting temperature<sup>a</sup></b> |
|-----------------------|----------------------------------------|
| wt                    | (47.3 ± 0.8 °C)<br>58.2 ± 0.3 °C       |
| Q35A                  | 58.1 ± 0.3 °C                          |
| S98A                  | n.d.                                   |
| S98C                  | 61.3 ± 1.0 °C                          |
| S98T                  | n.d.                                   |
| G127AG128AG131A       | 60.6 ± 0.3 °C                          |
| Q130A                 | 63.3 ± 0.3 °C                          |
| Q132A                 | 44.6 ± 1.1 °C                          |
| E135A                 | 62.1 ± 0.3 °C                          |
| E137A                 | 45.1 ± 0.8 °C                          |
| L144E                 | (44.3 ± 0.6 °C)<br>58.8 ± 0.3 °C       |
| L144G                 | (45.3 ± 0.8 °C)<br>56.6 ± 0.3 °C       |
| L144M                 | (46.4 ± 1.5 °C)<br>56.3 ± 0.9 °C       |
| L144R                 | 72.3 ± 0.6 °C                          |
| D170A                 | (56.0 ± 0.7 °C)<br>60.8 ± 0.5 °C       |
| R171A                 | 58.5 ± 0.4 °C                          |
| R171K                 | 58.9 ± 0.3 °C                          |

<sup>a</sup>Melting temperatures were determined as described in the Materials and Methods Sections. Mean values ± sd of three independent experiments are given. Minor peaks are in brackets.

Supplementary References:

1. Lee, B.-G., Park, E. Y., Lee, K.-E., Jeon, H., Sung, K. H., Paulsen, H., Rübsamen-Schaeff, H., Brötz-Oesterhelt, H., and Song, H. K. (2010) *Nat Struct Mol Biol* **17**, 471-478
2. Wang, J., Hartling, J. A., and Flanagan, J. M. (1997) *Cell* **91**, 447-456
3. Kim, D. Y., and Kim, K. K. (2008) *J Mol Biol* **379**, 760-771
4. Kang, S. G., Maurizi, M. R., Thompson, M., Mueser, T., and Ahvazi, B. (2004) *J Struct Biol* **148**, 338-352
5. Zhang, J., Ye, F., Lan, L. F., Jiang, H. L., Luo, C., and Yang, C. G. (2011) *J Biol Chem* **286**, 37590-37601
6. Geiger, S. R., Böttcher, T., Sieber, S.A., Cramer, P. (2011) *Angew Chem Int Ed Engl* **50**, 5749-5752
7. Ingvarsson, H., Maté, M. J., Högbom, M., Portno, D., Benaroudj, N., Alzari, P. M., Ortiz-Lombardí, M., and Unge, T. (2007) *Acta Crystallographica Section D* **D63**, 249-259
8. Vedadi, M., Lew, J., Artz, J., Amani, M., Zhao, Y., Dong, A., Wasney, G. A., Gao, M., Hills, T., and Brox, S. (2007) *Mol Biochem Parasitol* **151**, 100-110
9. Gribun, A., Kimber, M. S., Ching, R., Sprangers, R., Fiebig, K. M., and Houry, W. A. (2005) *J Biol Chem* **280**, 16185-16196
10. Lee, B. G., Kim, M. K., and Song, H. K. (2011) *Mol Cells* **32**, 589-595
